# Supplementary figures and images for: In-plume and out-of-plume analysis of aerosol-cloud interactions derived from the 2014–15 Holuhraun volcanic eruption
Source: Copernicus journal article supplement (doi:10.5194/egusphere-2024-360), 2024-02-08

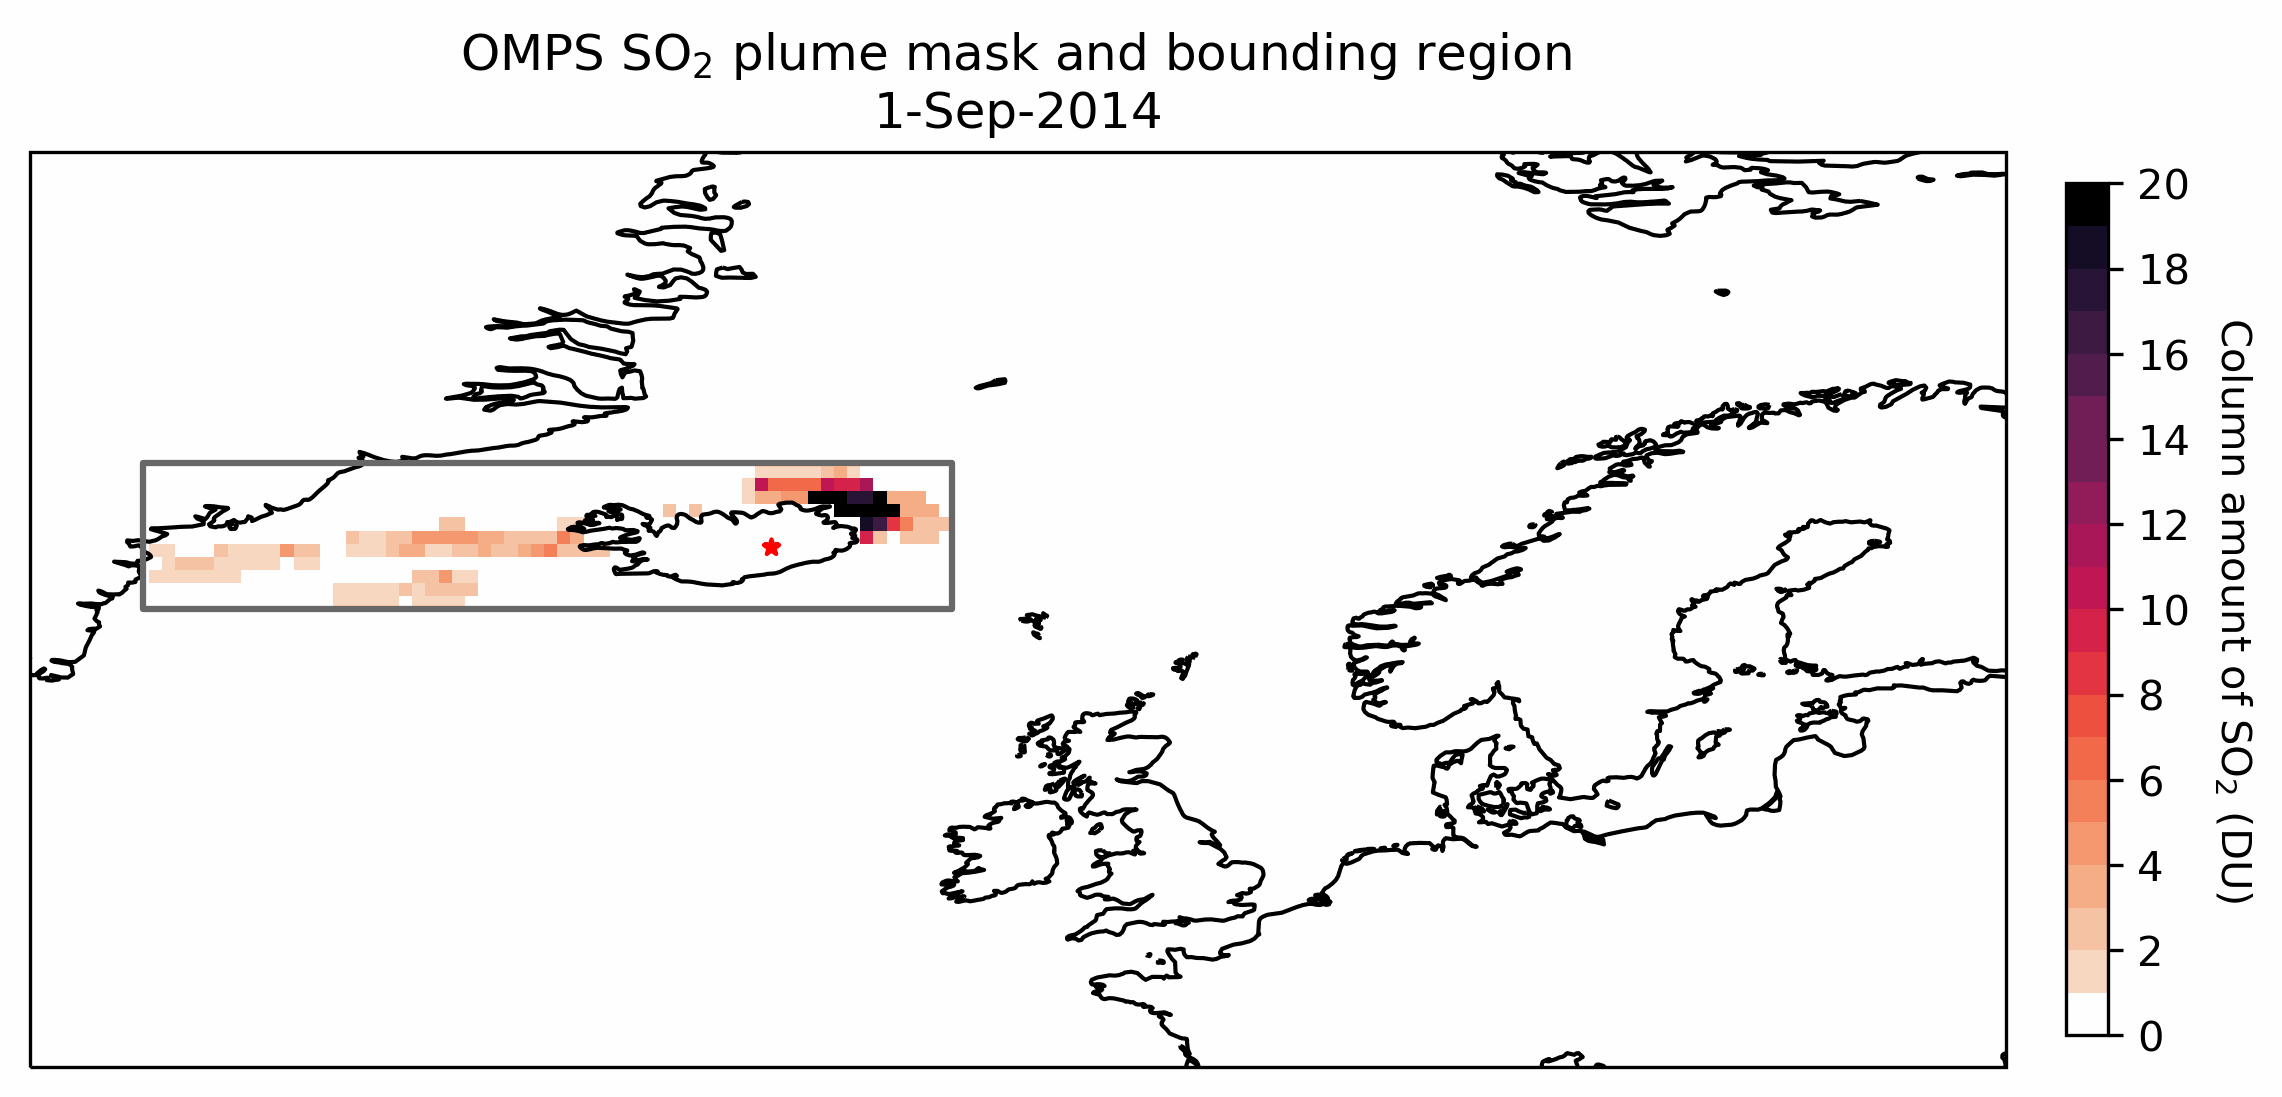

Supplement: Supplementary file 1 [file egusphere-2024-360-supplement.zip › ap_holplumeanalysis_SI_submit_1/animationS1_omps_so2_1DUfiltermask_wlandmask.gif]

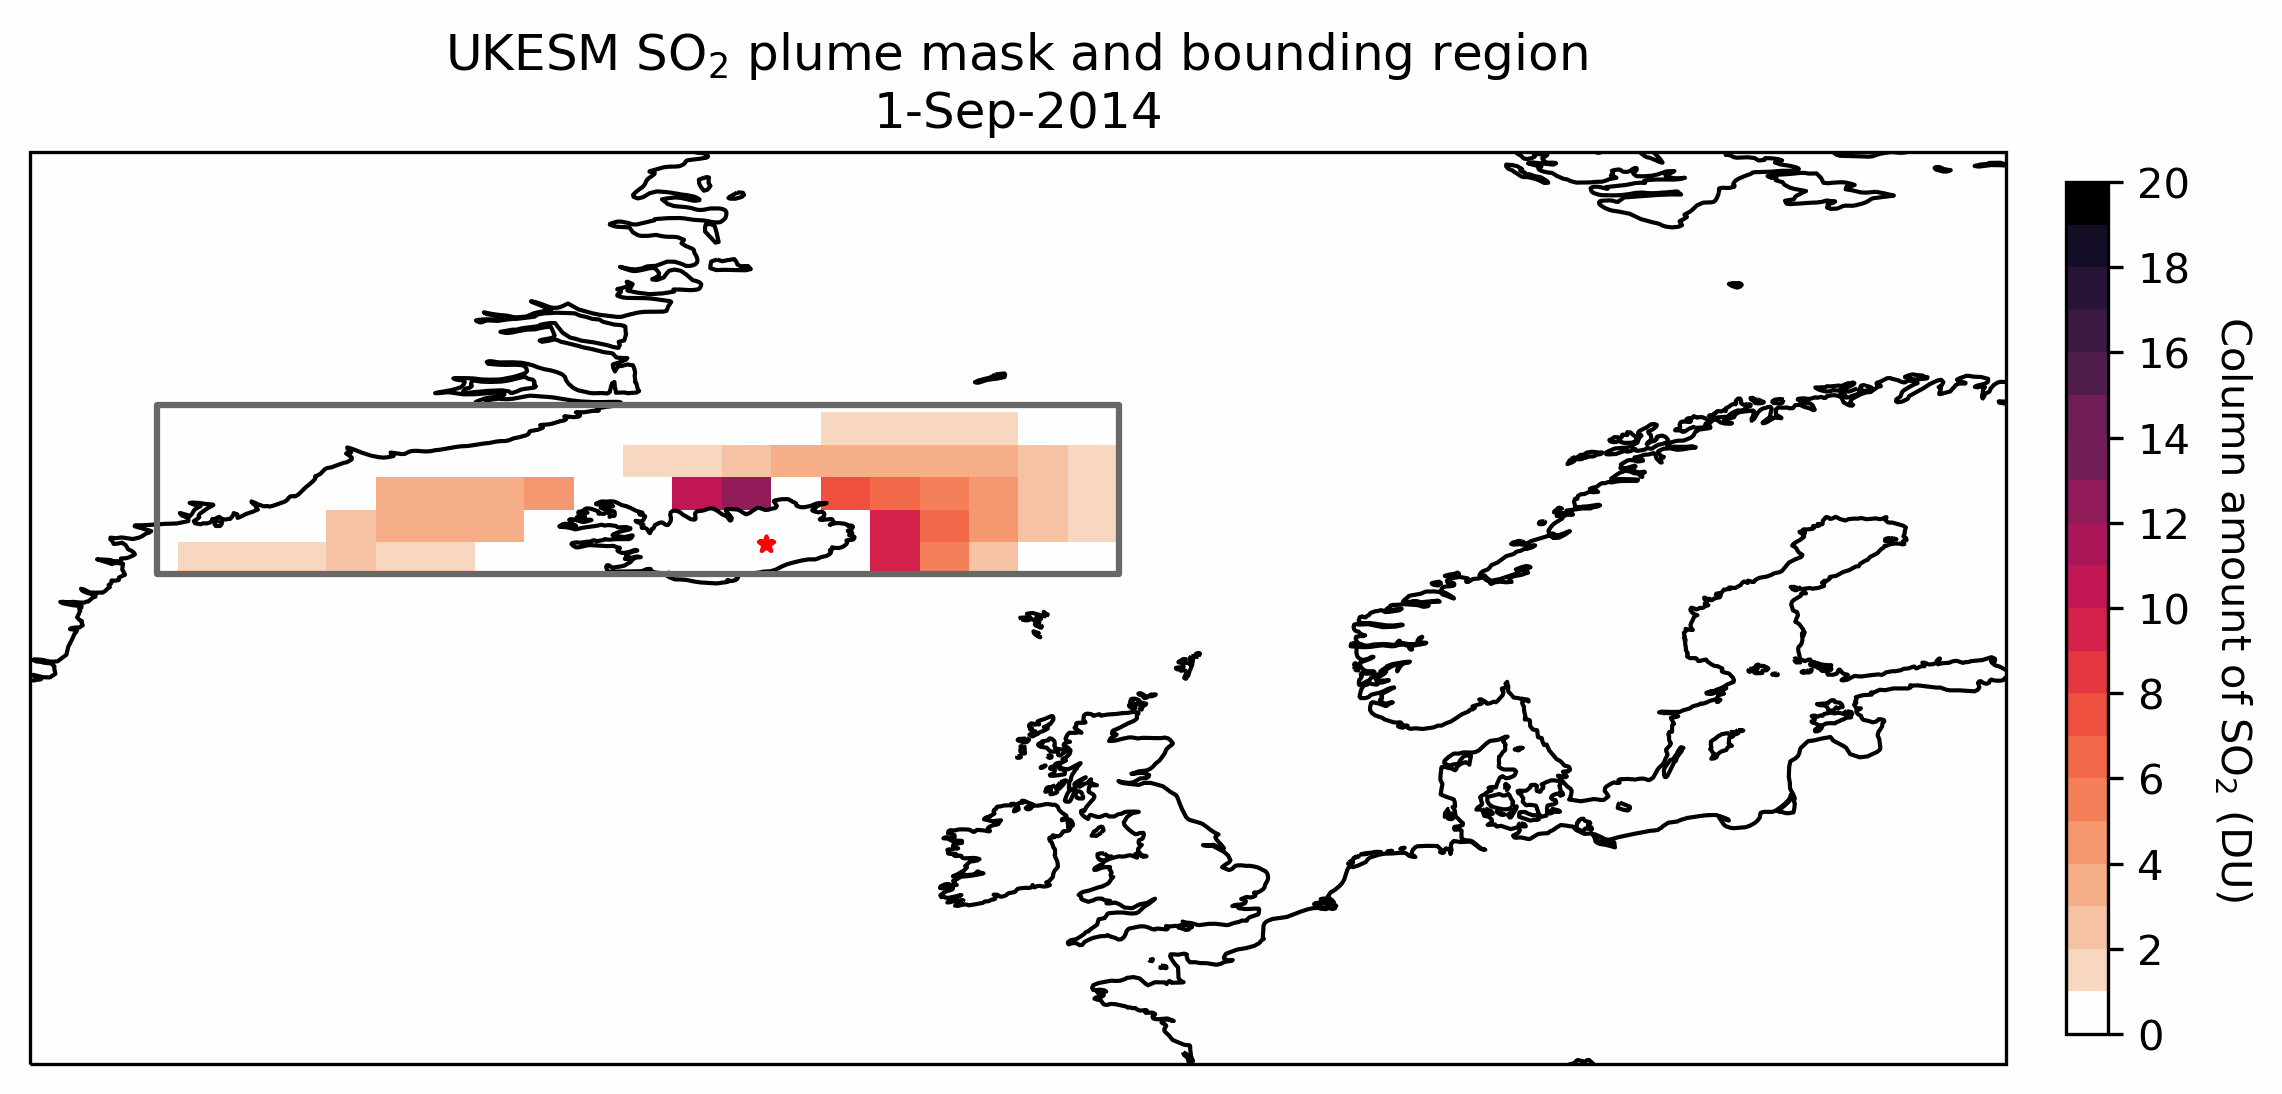

Supplement: Supplementary file 1 [file egusphere-2024-360-supplement.zip › ap_holplumeanalysis_SI_submit_1/animationS2_ukesm_so2_1DUmask_wlandmask.gif]

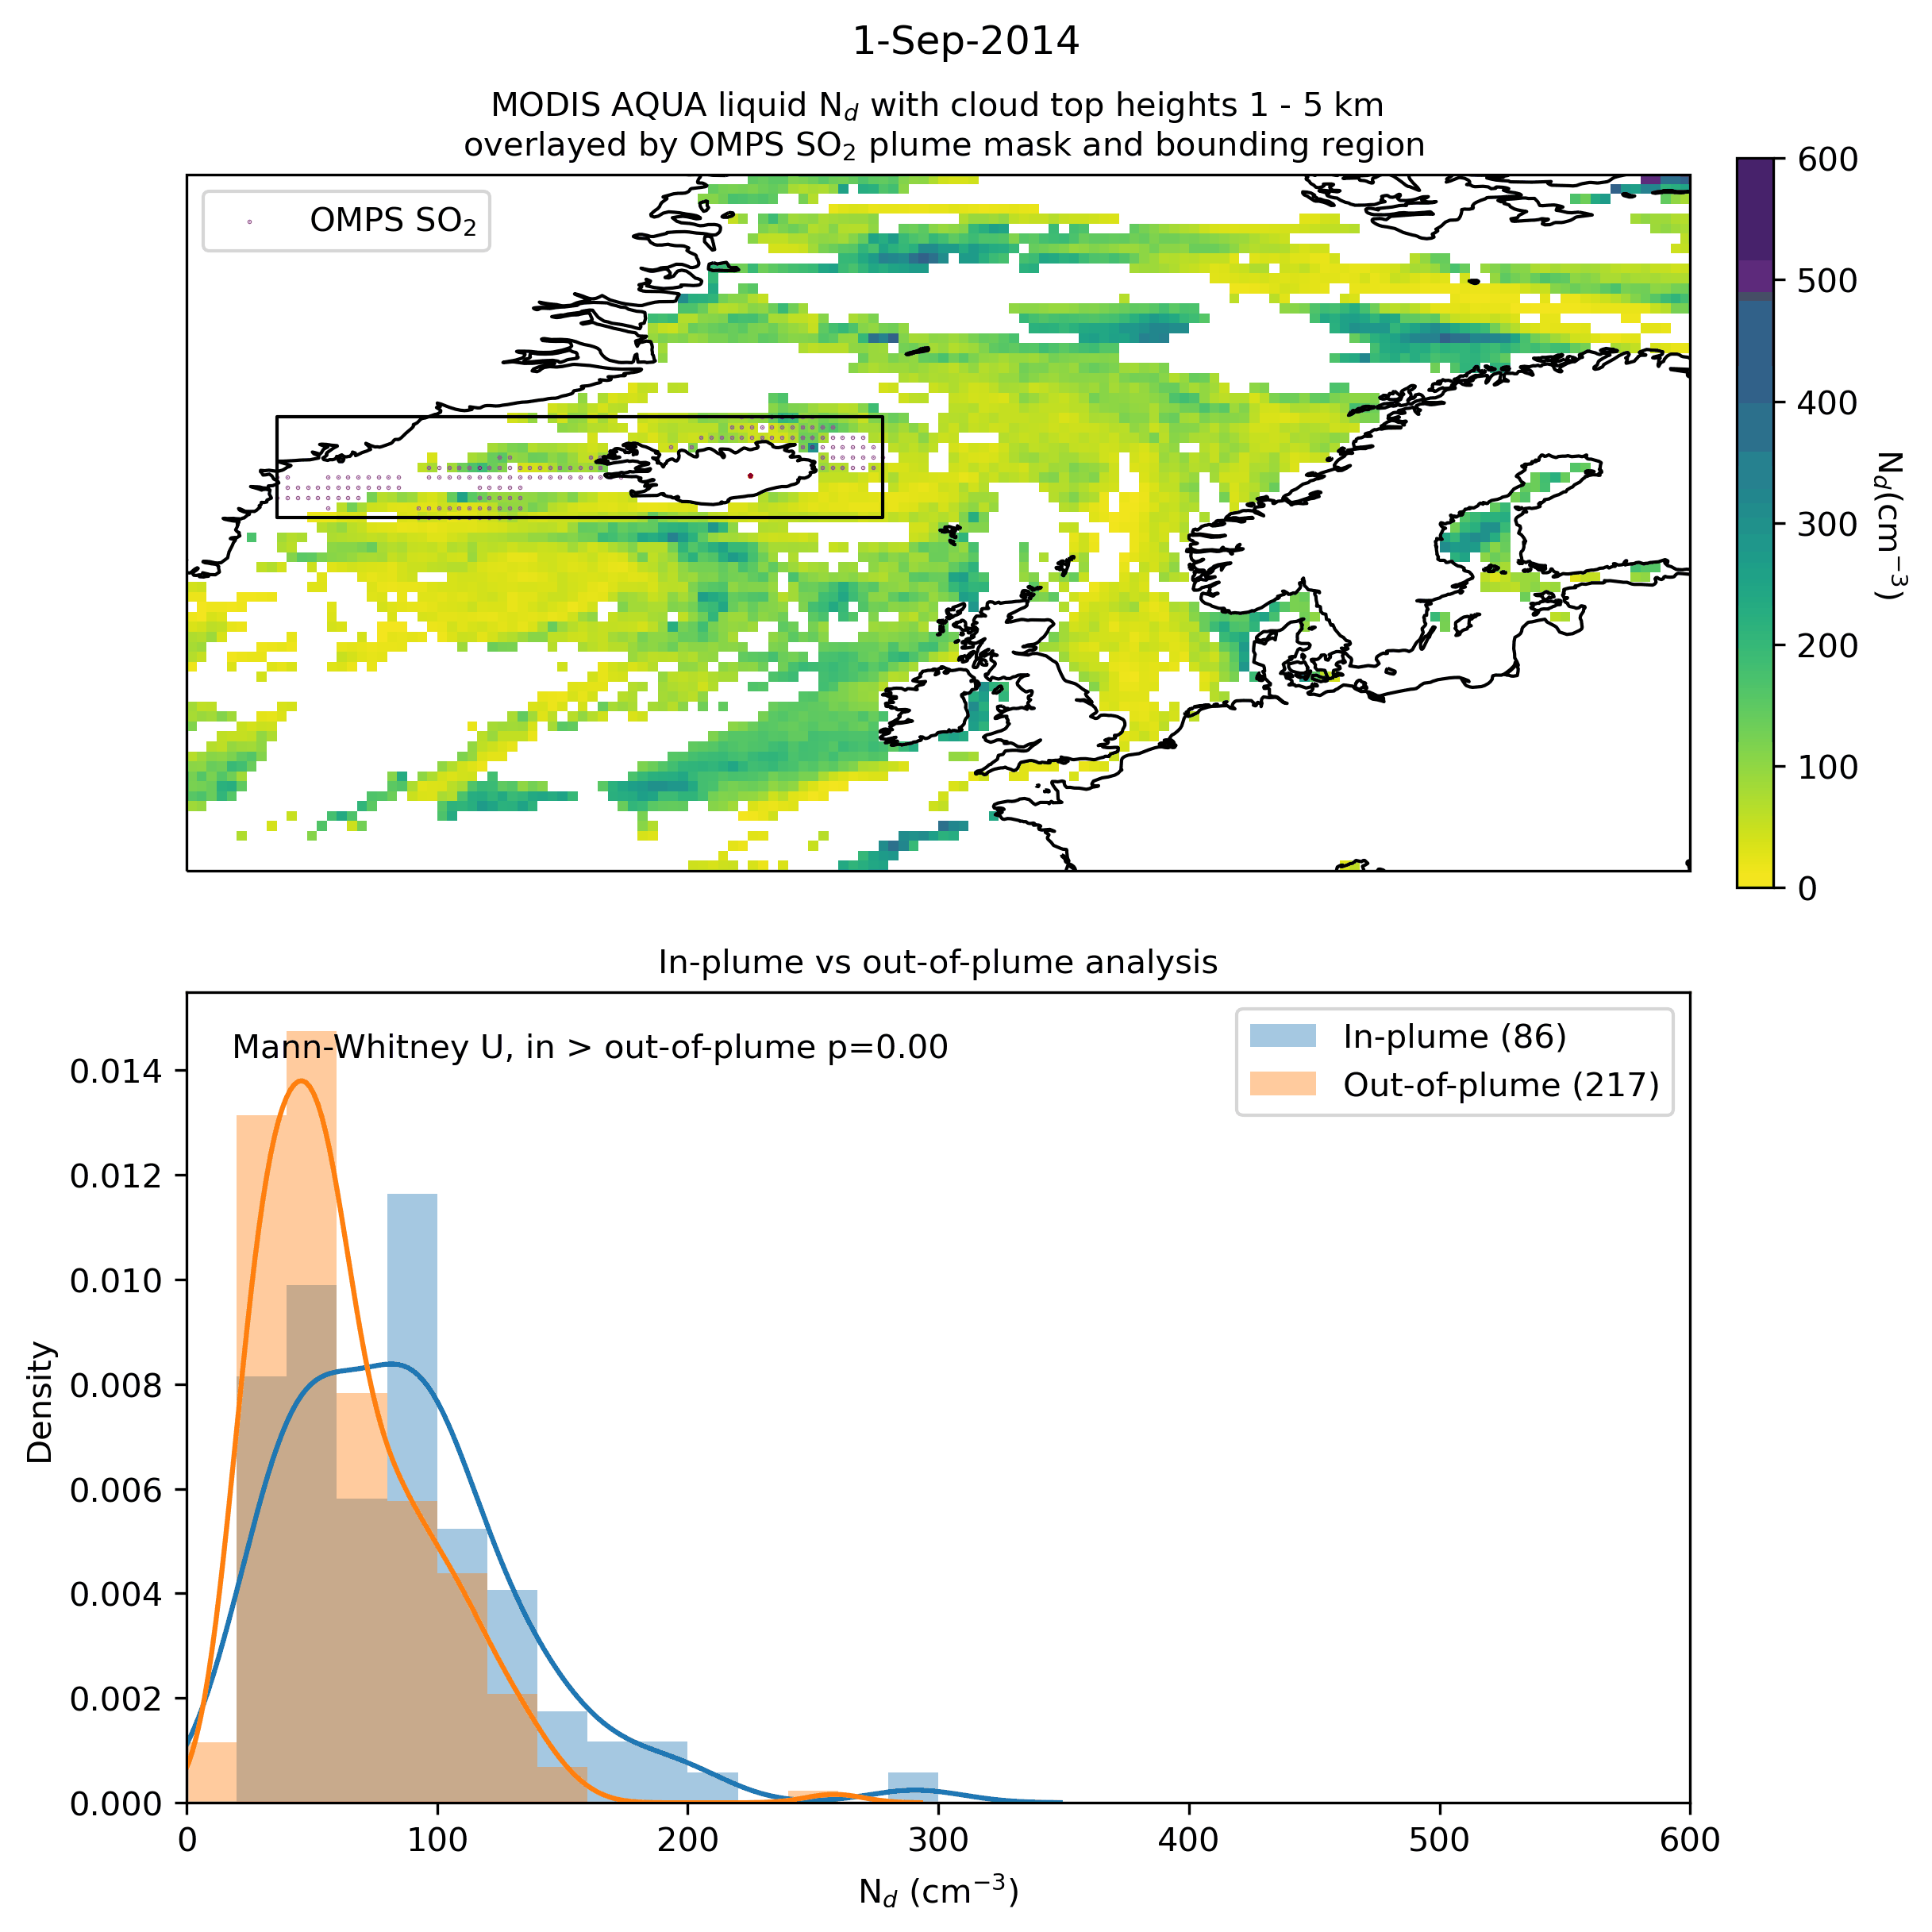

Supplement: Supplementary file 1 [file egusphere-2024-360-supplement.zip › ap_holplumeanalysis_SI_submit_1/animationS3_modis_nd_daily-plume-analysis.gif]

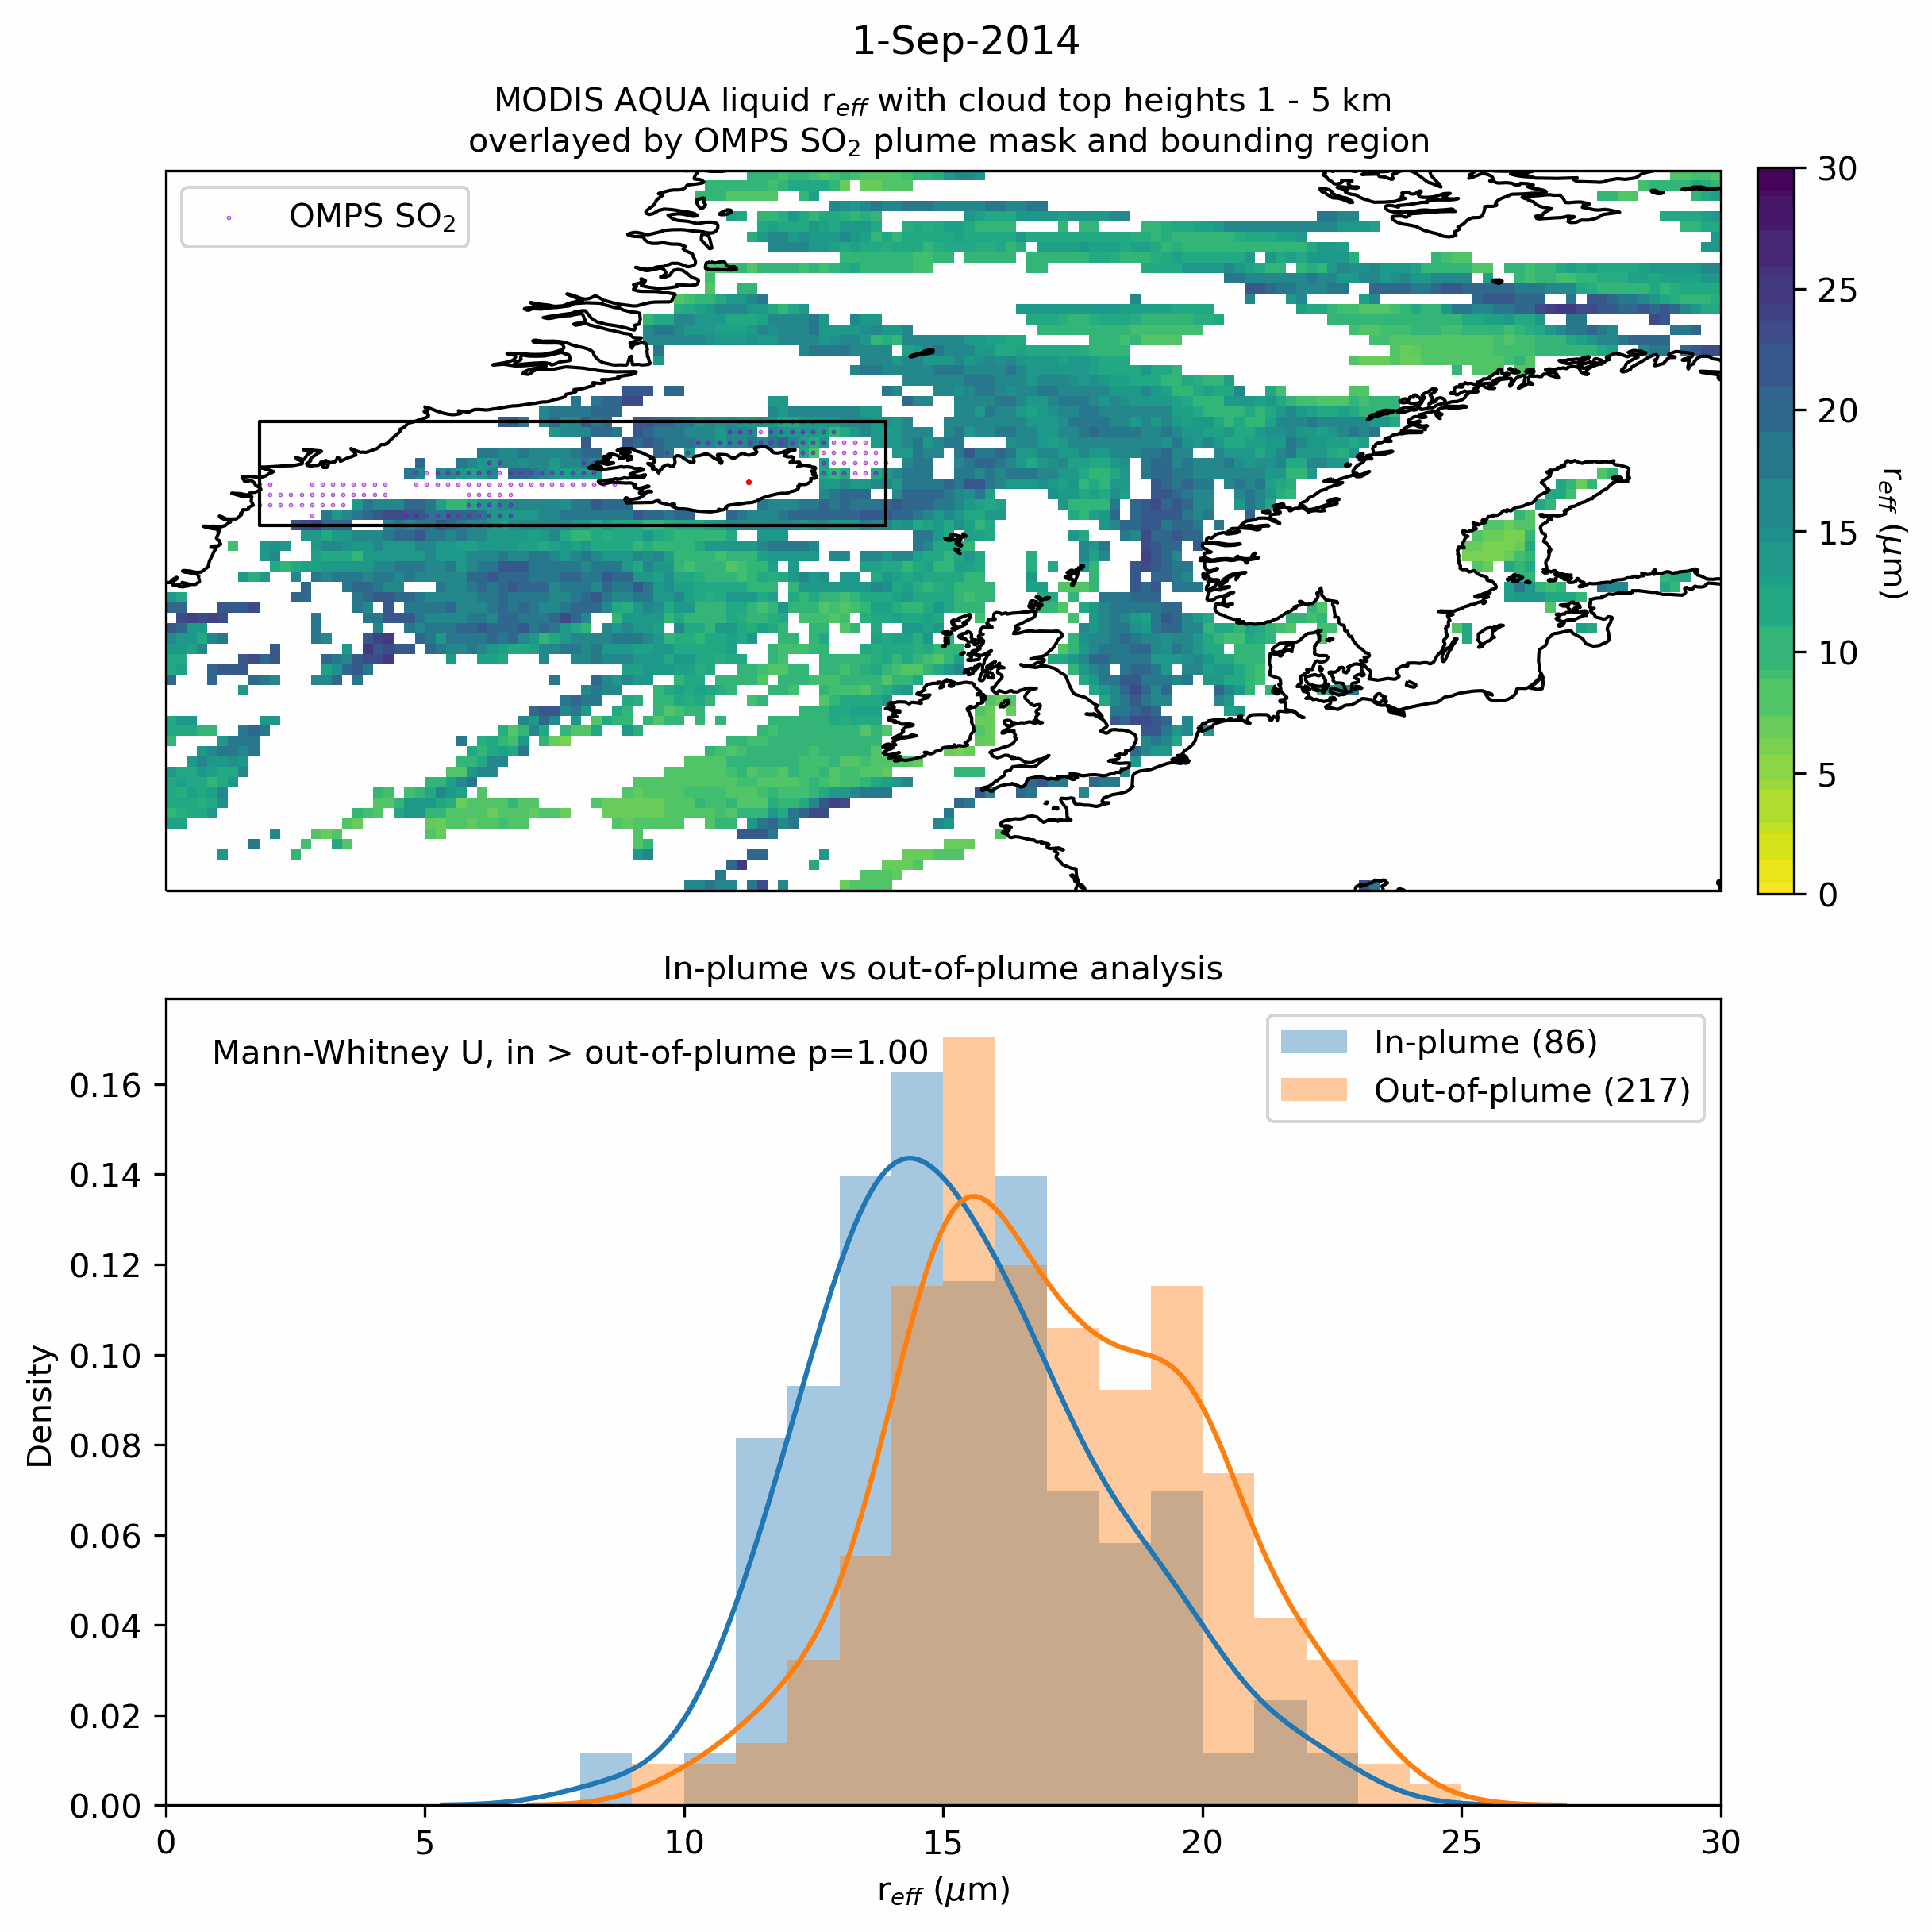

Supplement: Supplementary file 1 [file egusphere-2024-360-supplement.zip › ap_holplumeanalysis_SI_submit_1/animationS4_modis_reff_daily-plume-analysis.gif]

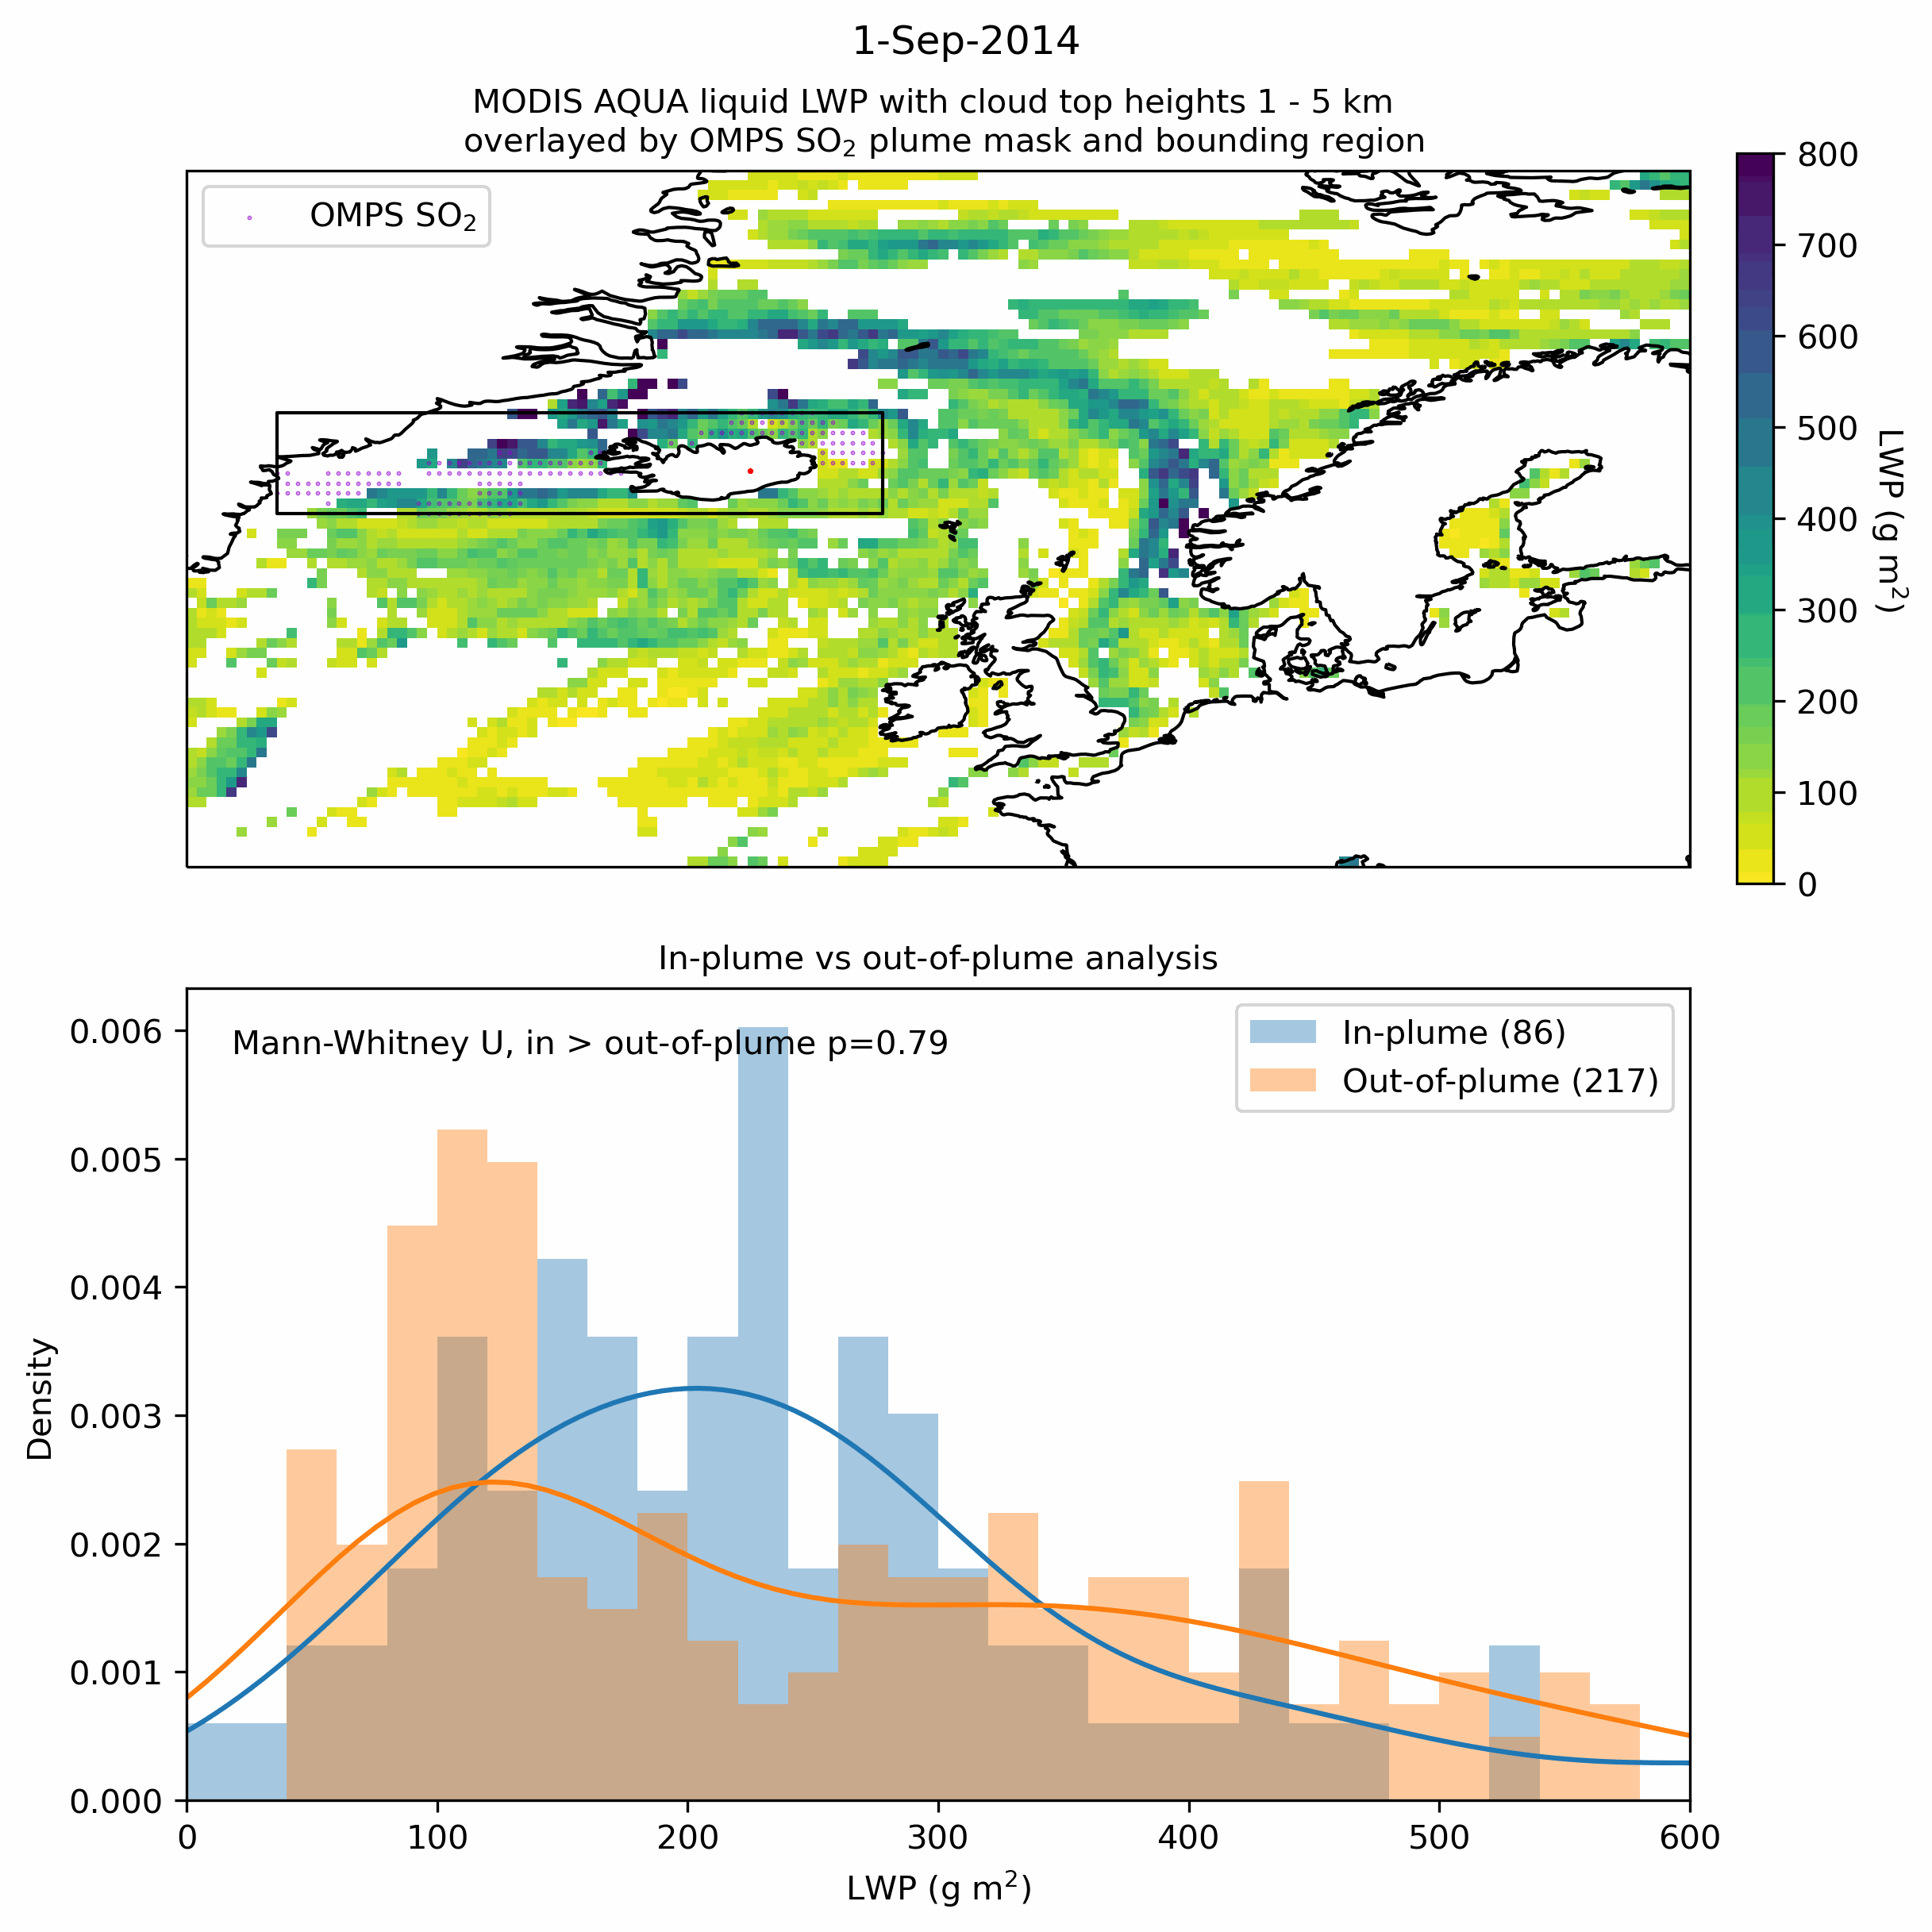

Supplement: Supplementary file 1 [file egusphere-2024-360-supplement.zip › ap_holplumeanalysis_SI_submit_1/animationS5_modis_lwp_daily-plume-analysis.gif]
